# Supplementary material for: Dec1 Deficiency Suppresses Cardiac Perivascular Fibrosis Induced by Transverse Aortic Constriction
Source: Int J Mol Sci. 2019 Oct 8;20(19):4967. doi: 10.3390/ijms20194967 (PMC6802004; doi:10.3390/ijms20194967)
Supplement: Supplementary file 1 [file ijms-20-04967-s001.pdf]

## Supplementary figures

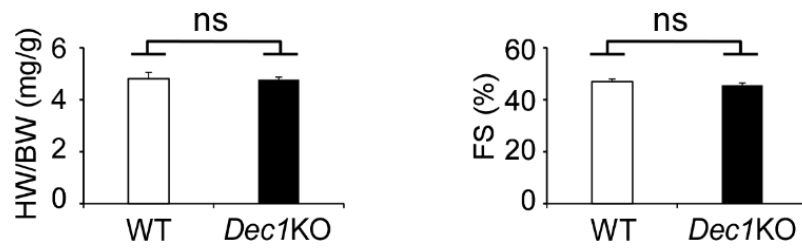

**Figure S1.** Heart weight/Body weight ratio and fractional shortening in intact WT and *Dec1*KO mice at ZT2. HW/BW ratio in intact WT and *Dec1*KO mice. FS assessed by echocardiogram in intact WT and *Dec1*KO mice. Data are the mean  $\pm$  SEM of five mice and were analyzed by a two-tailed Student's t-test. NS: not significant.

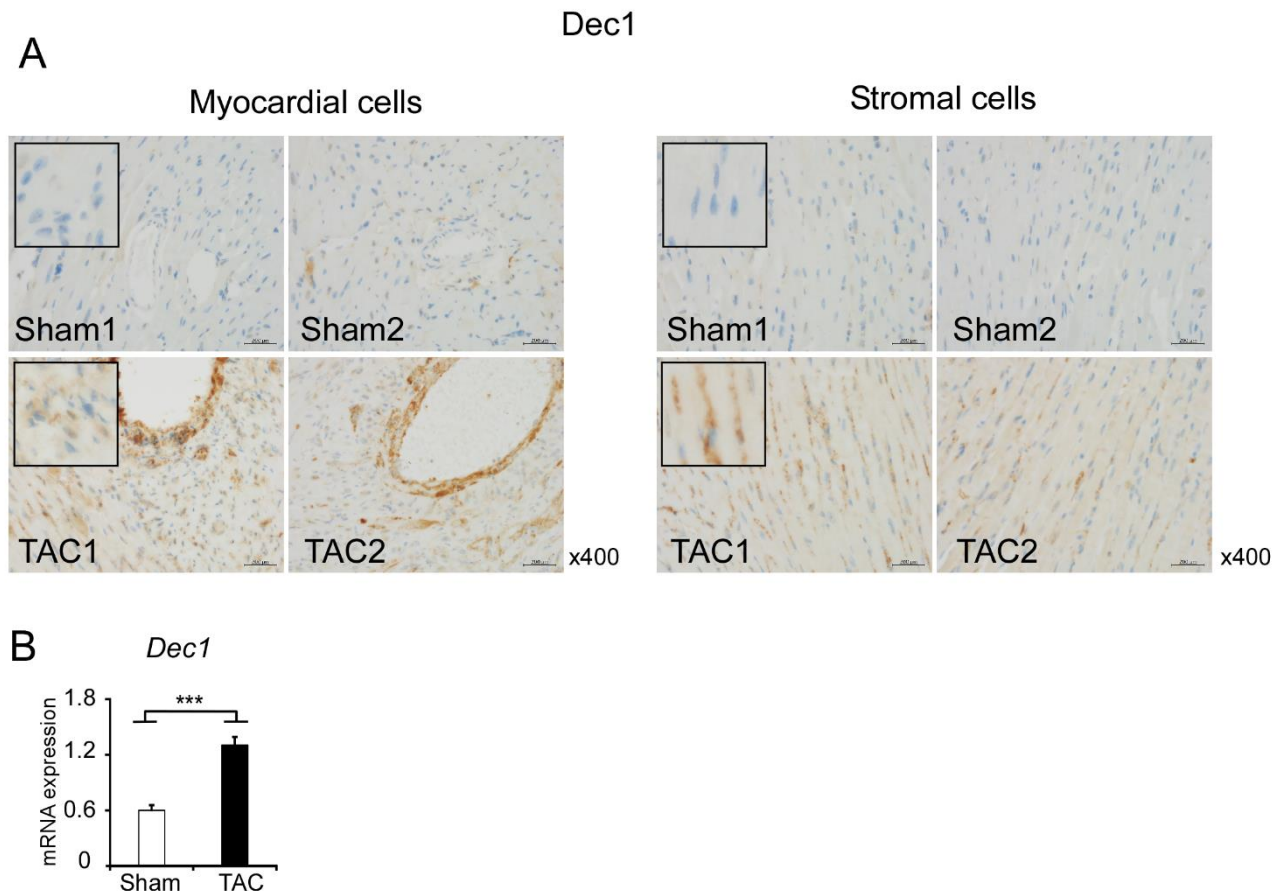

**Figure S2.** TAC induced *Dec1* expression at 1w after operation. (A) Immunohistochemical detection of *Dec1* in myocardial and stromal cells. Representative images of two WT mice (WT1, WT2) treated by TAC and sham (sham1, sham2) at 1w. The black square shows representative large images, magnification 400 $\times$ . (B) The relative mRNA expression of *Dec1* at 1w after TAC. Data are the mean  $\pm$  SEM and analyzed by a two-tailed Student's t-test. \*\*\*  $p < 0.001$ .

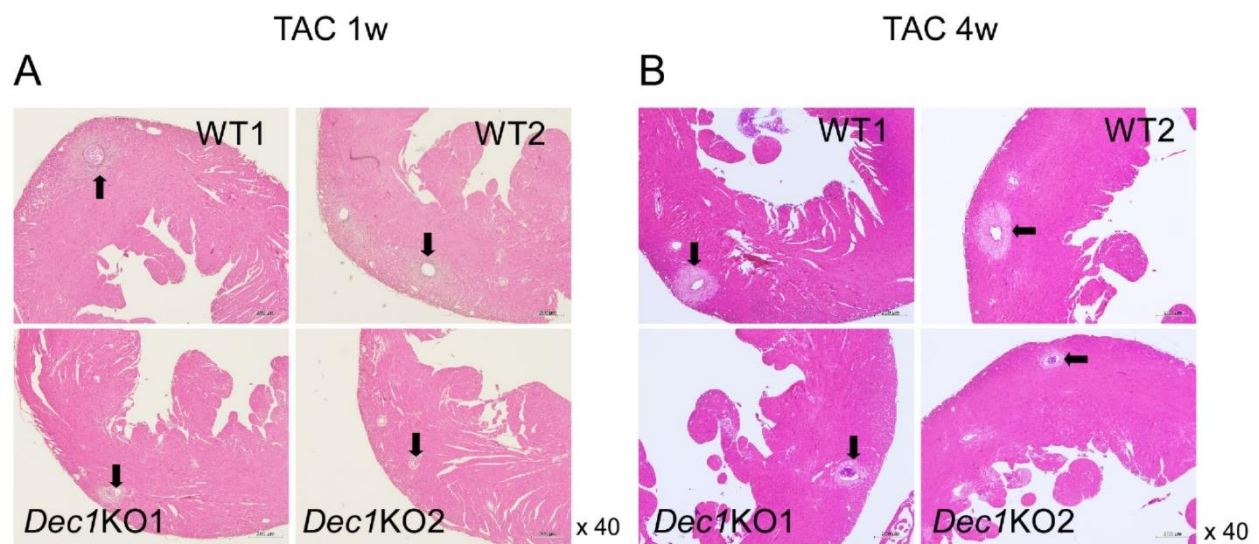

**Figure S3.** The observation of cardiac perivascular fibrosis at 1 and 4w after TAC. (A) H&E staining of perivascular lesions. Representative images of two independent WT (WT1, WT2) and *Dec1*KO (*Dec1*KO1, *Dec1*KO2) mice at 1w after TAC. (B) At 4w after TAC. Black arrow shows cardiac perivascular lesions. magnification 40 $\times$ .

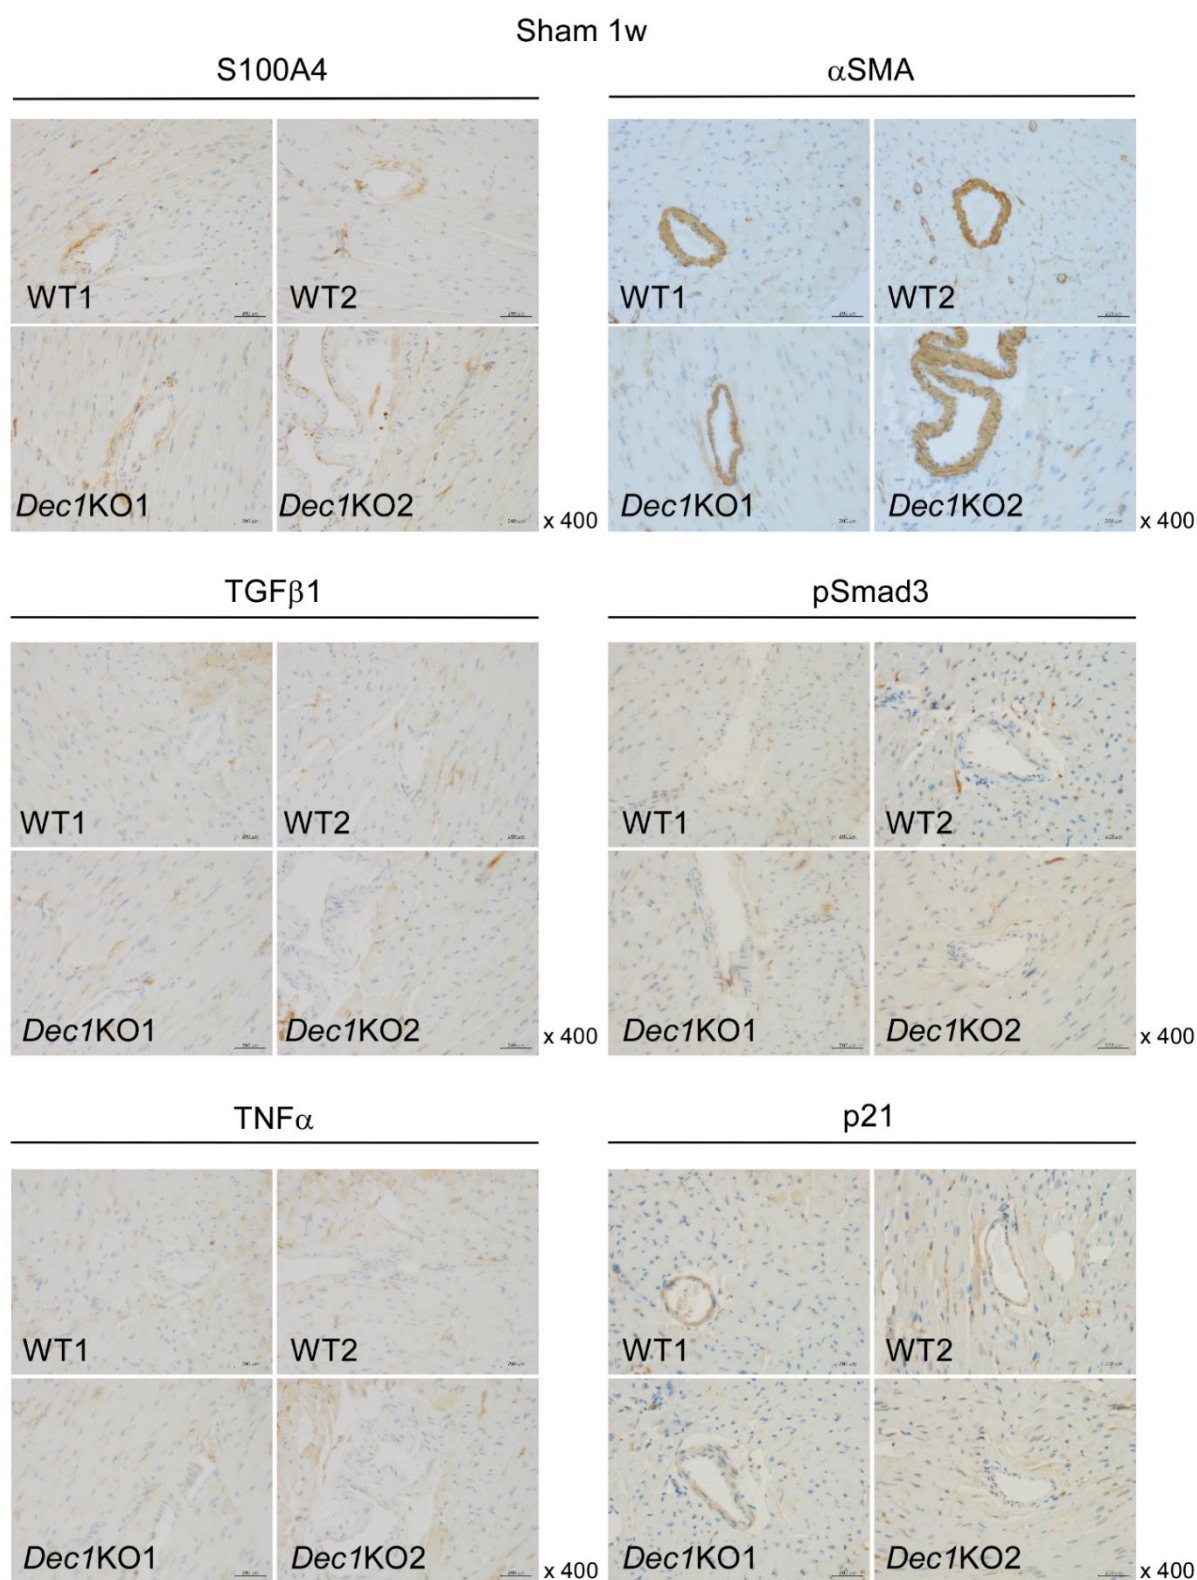

**Figure S4.** Immunohistochemical detection of S100A4,  $\alpha$ SMA, TGF $\beta$ 1, pSmad3, TNF $\alpha$  and p21 in WT and *Dec1*KO hearts at 1w after sham treatment. Magnification 400 $\times$ .

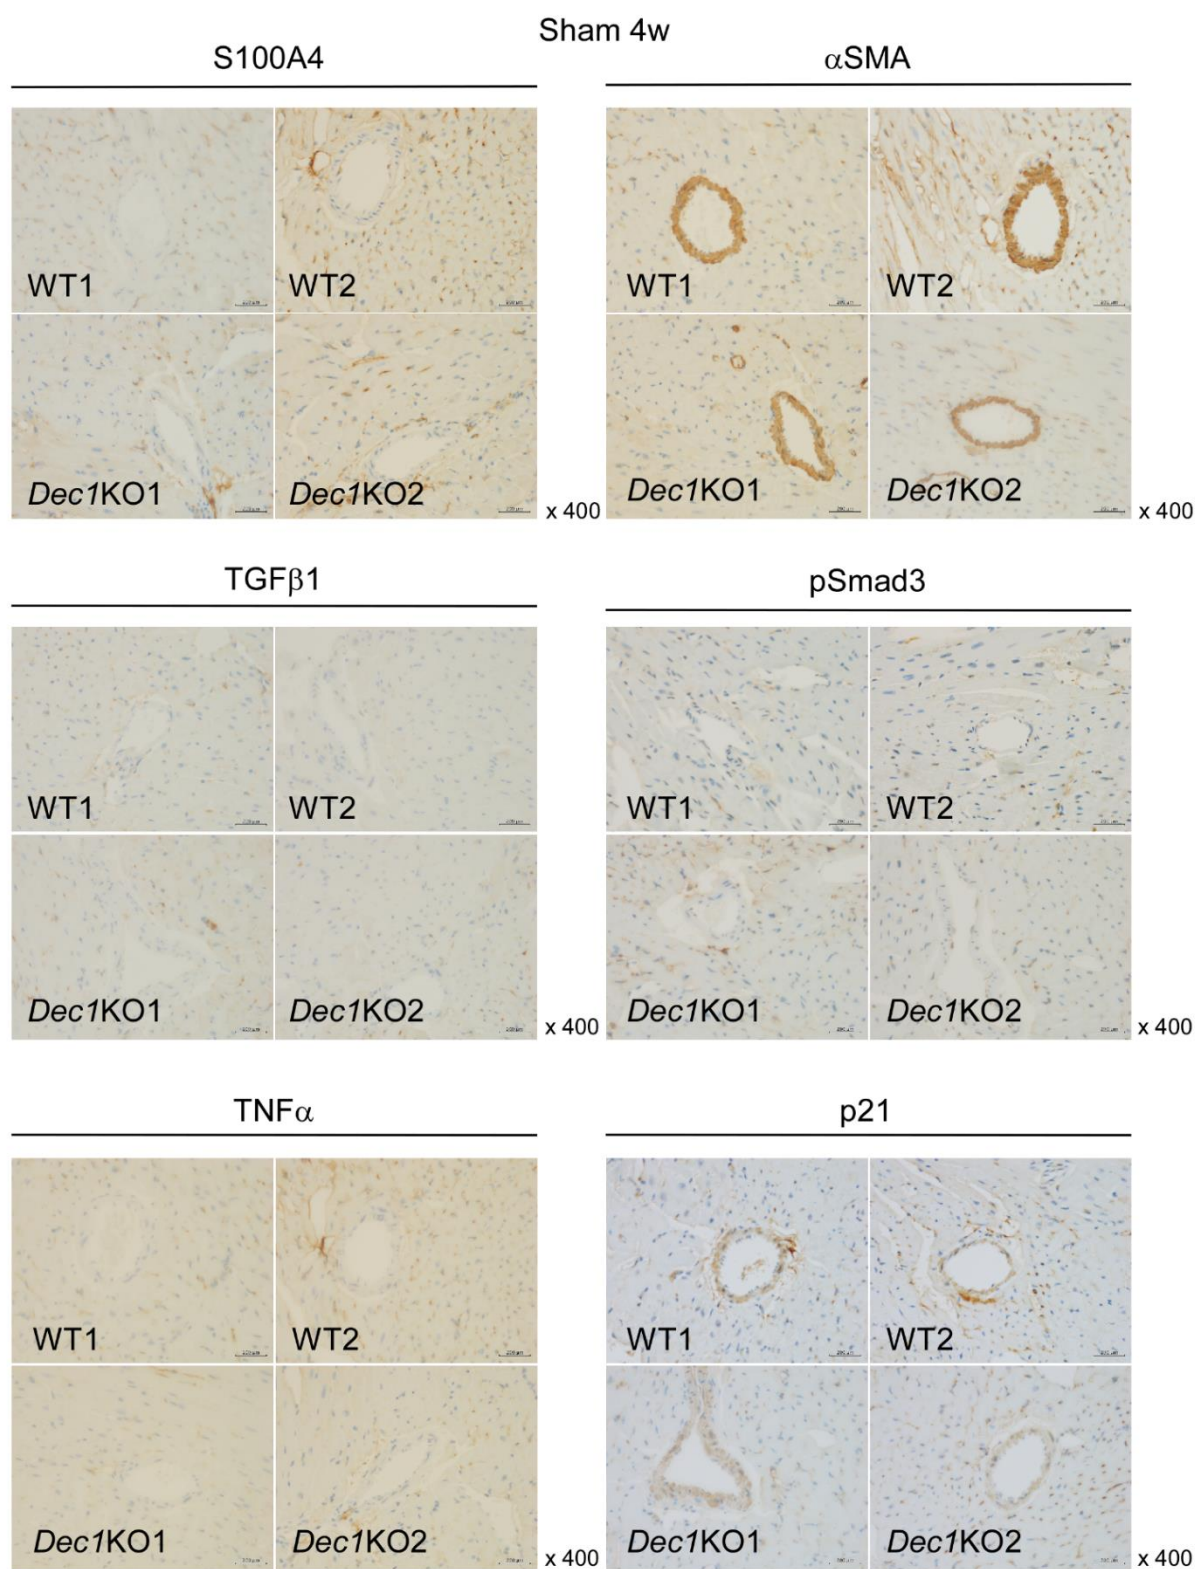

**Figure S5.** Immunohistochemical detection of S100A4,  $\alpha$ SMA, TGF $\beta$ 1, pSmad3, TNF $\alpha$  and p21 in WT and *Dec1*KO hearts at 4w after sham treatment. Magnification 400 $\times$ .

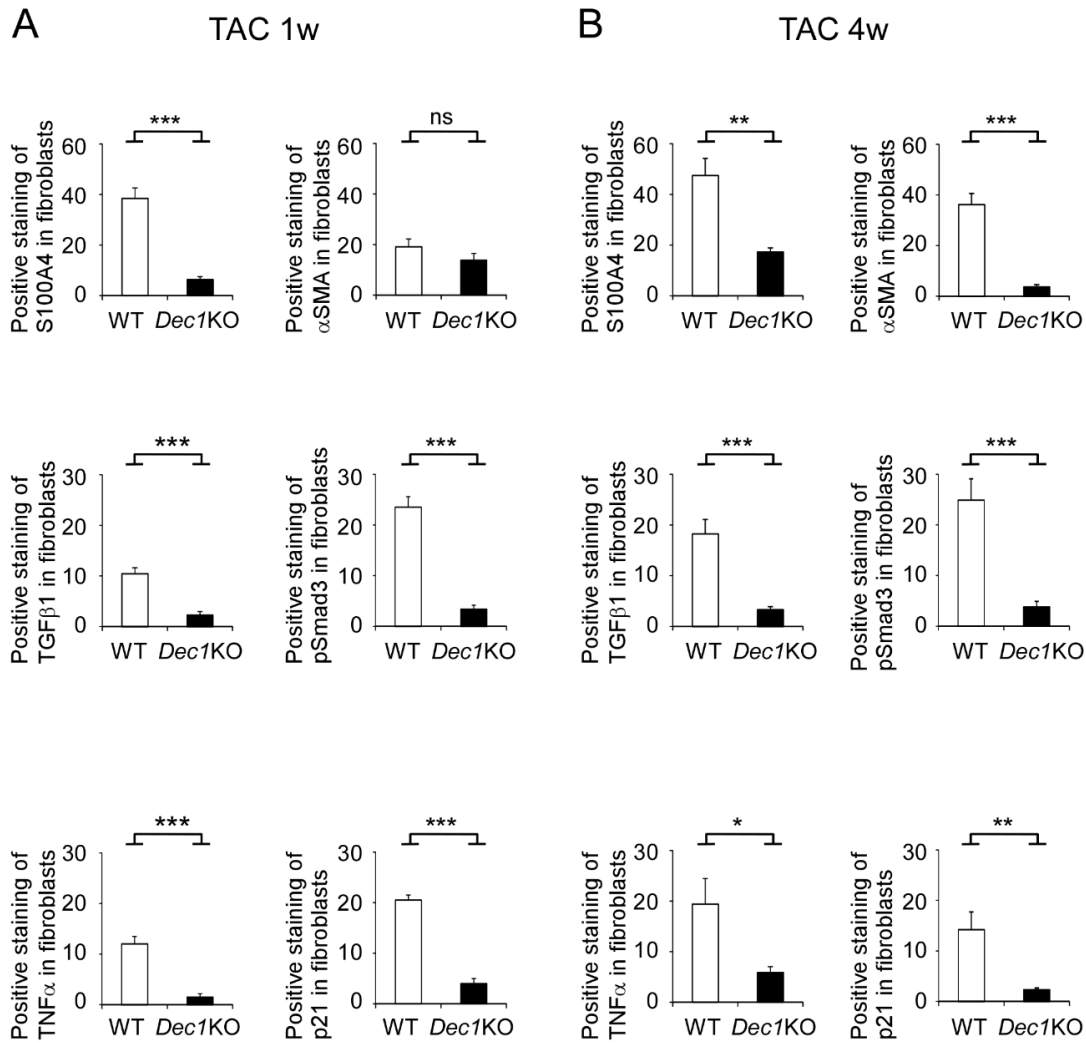

**Figure S6.** Quantification of S100A4, αSMA, TGFβ1, pSmad3, TNFα and p21 immunostaining in WT and *Dec1KO* hearts at 1 and 4w after TAC. **(A)** Positive staining for S100A4, αSMA, TGFβ1, pSmad3, TNFα and p21 in perivascular fibroblasts of WT and *Dec1KO* hearts at 1w after TAC. The cells were counted in eight to ten random microscopic fields of two independent samples at magnification 400×. **(B)** Positive staining for S100A4, αSMA, TGFβ1, pSmad3, TNFα and p21 in perivascular fibroblasts of WT and *Dec1KO* hearts at 4w after TAC. The cells were counted in six to eight random microscopic fields of three to four independent samples at magnification 400×. Data are the mean ± SEM and analyzed by a two-tailed Student's t-test. \*  $p < 0.05$ . \*\*  $p < 0.01$ . \*\*\*  $p < 0.001$ . NS: not significant.
